# Supplementary material for: Diaphorin, a Polyketide Produced by a Bacterial Symbiont of the Asian Citrus Psyllid, Inhibits the Growth and Cell Division of Bacillus subtilis but Promotes the Growth and Metabolic Activity of Escherichia coli
Source: PubMed Central journal article supplement (PMC9430481; doi:10.1128/spectrum.01757-22), 2022-07-27
Supplement: spectrum.01757-22-s0001.pdf [file spectrum.01757-22-s0001.pdf]

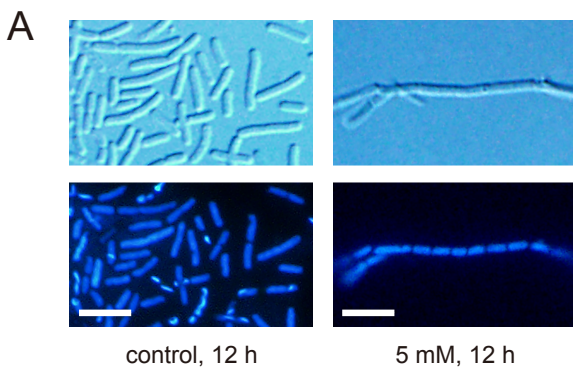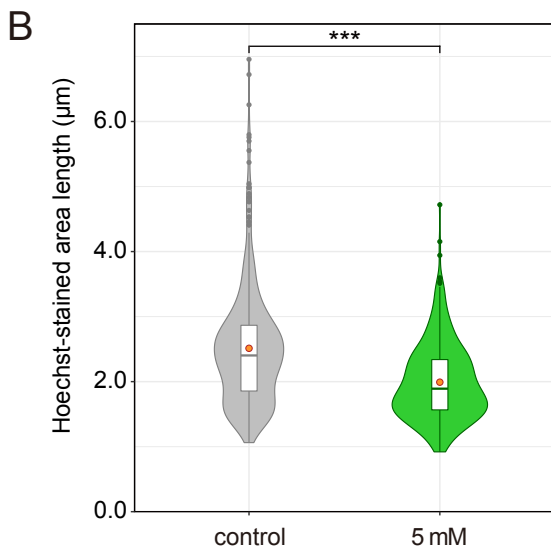

**Figure S1.** Chained *B. subtilis* cells caused by diaphorin treatment. (A) DIC and fluorescence images of Hoechst-stained *B. subtilis* cells after cultivation for 12 h in a medium containing 0 or 5 mM of diaphorin. Bars, 5  $\mu\text{m}$ . (B) Lengths of Hoechst-stained nucleoid areas in *B. subtilis* cells cultured in a medium containing 0 (gray;  $n = 400$ ) or 5 mM diaphorin (green;  $n = 400$ ) for 12 h. Violin plots showing kernel density estimation are overlaid with box plots showing median, quartiles, minimum, maximum, and outliers. Orange dots represent the means.
